# Supplementary material
Source: PubMed Central journal article supplement (PMC3831631)

antigen.

Figure S1. Anti-CD3 QD activate antigen-experienced cells without co-existence of

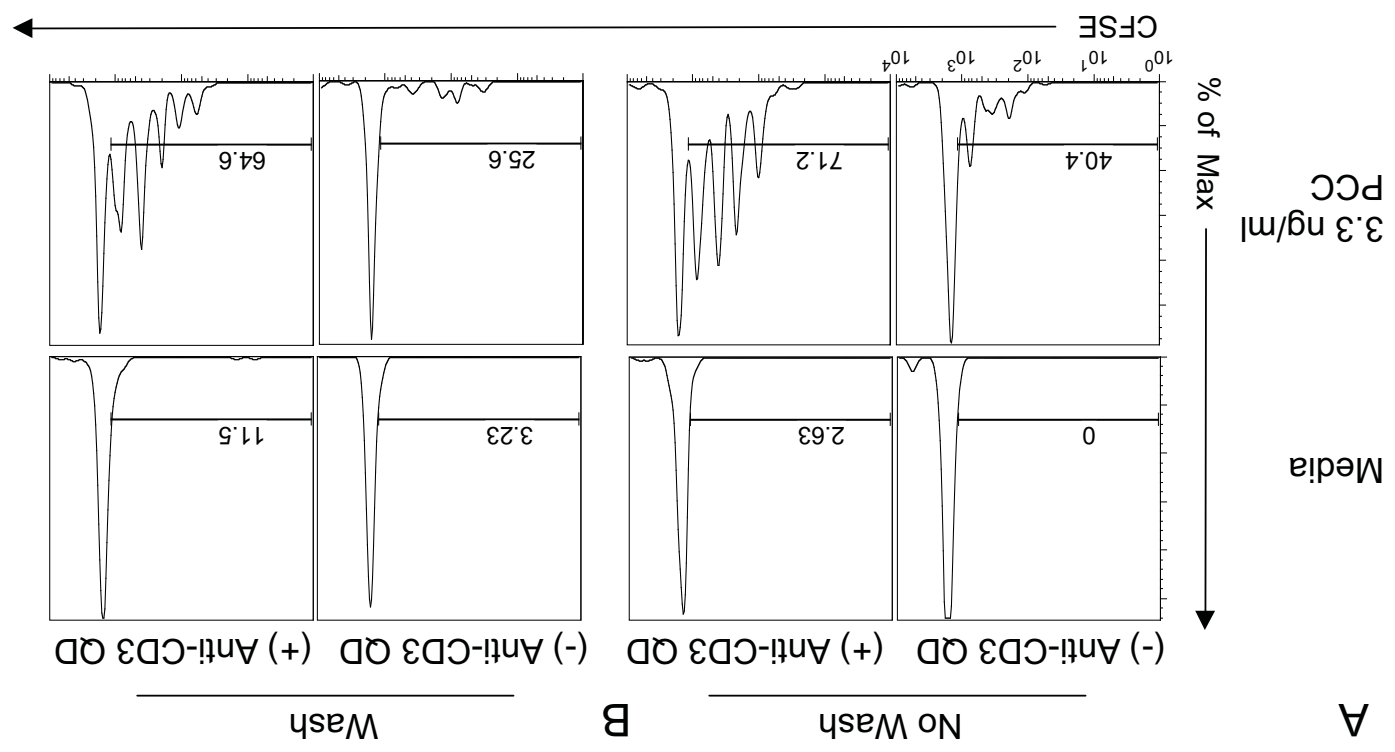

**Figure S2. Anti-CD3 QD do not trigger broad naïve/memory T cell response.**

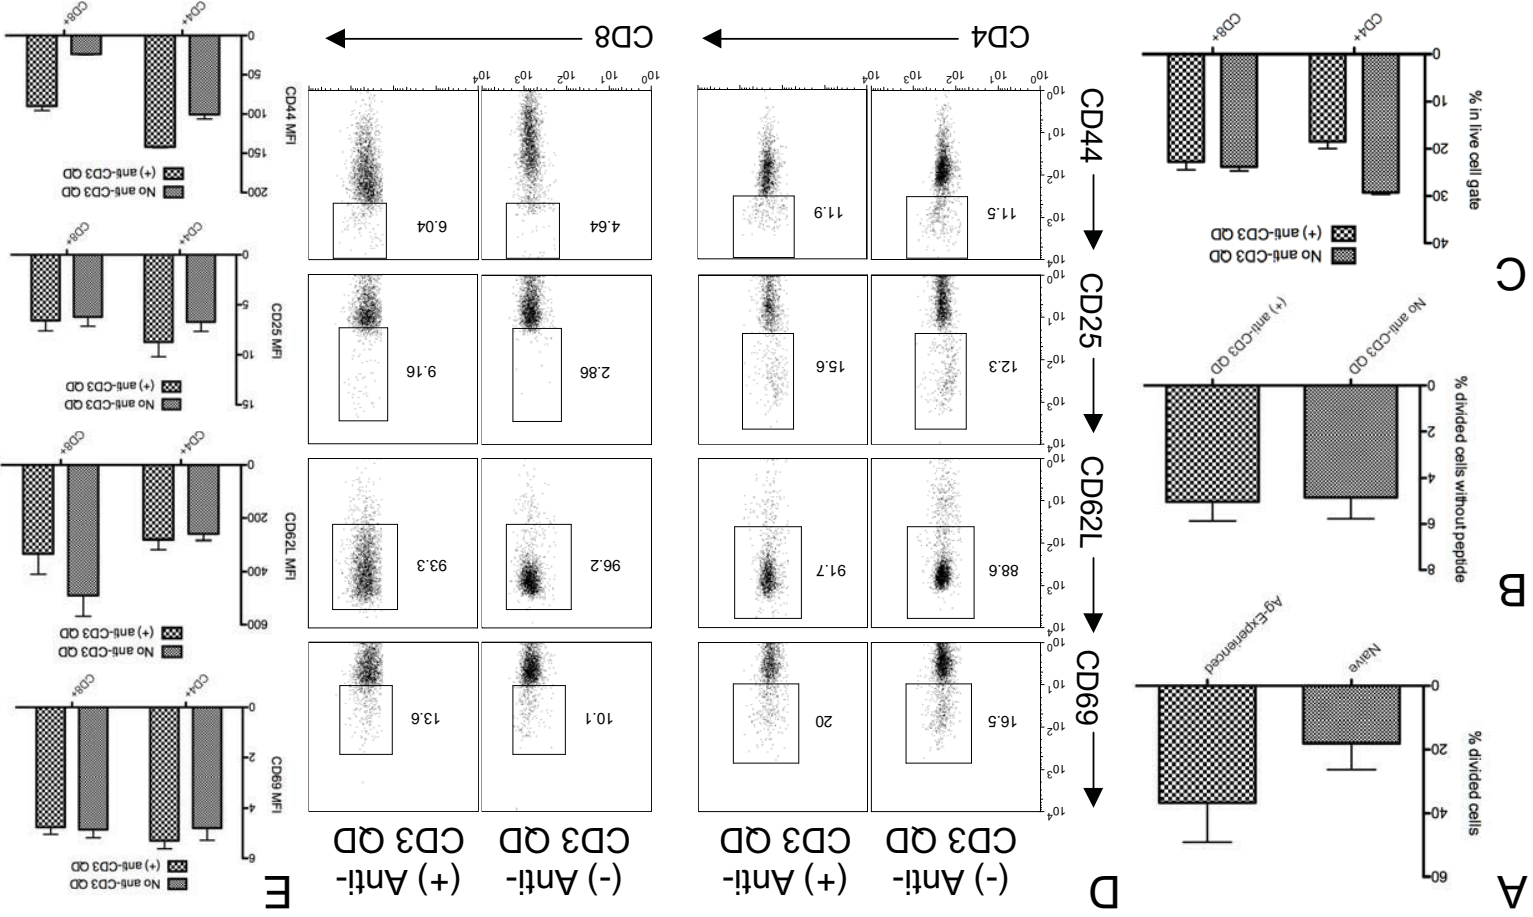

Supplement: NIHMS525402-supplement-1.pdf [file NIHMS525402-supplement-1.pdf]
